# Supplementary material for: CAFET Algorithm Reveals Wnt/PCP Signature in Lung Squamous Cell Carcinoma
Source: PLoS One. 2011 Oct 10;6(10):e25807. doi: 10.1371/journal.pone.0025807 (PMC3189939; doi:10.1371/journal.pone.0025807)
Supplement: Table S8 — Genes related to the Wnt pathway. (XLSX) [file pone.0025807.s008.xlsx]

## Sheet: table s8
# Genes in WNT related functional groups in table4a
GeneID	GeneSymbol	GeneName
166	AES	amino-terminal enhancer of split
324	APC	adenomatous polyposis coli
387	RHOA	ras homolog gene family, member A
595	CCND1	cyclin D1
817	CAMK2D	calcium/calmodulin-dependent protein kinase II delta
818	CAMK2G	calcium/calmodulin-dependent protein kinase II gamma
894	CCND2	cyclin D2
896	CCND3	cyclin D3
1387	CREBBP	CREB binding protein
1452	CSNK1A1	casein kinase 1, alpha 1
1453	CSNK1D	casein kinase 1, delta
1454	CSNK1E	casein kinase 1, epsilon
1455	CSNK1G2	casein kinase 1, gamma 2
1456	CSNK1G3	casein kinase 1, gamma 3
1457	CSNK2A1	casein kinase 2, alpha 1 polypeptide
1459	CSNK2A2	casein kinase 2, alpha prime polypeptide
1487	CTBP1	C-terminal binding protein 1
1488	CTBP2	C-terminal binding protein 2
1499	CTNNB1	catenin (cadherin-associated protein), beta 1, 88kDa
1500	CTNND1	catenin (cadherin-associated protein), delta 1
1855	DVL1	dishevelled, dsh homolog 1 (Drosophila)
1856	DVL2	dishevelled, dsh homolog 2 (Drosophila)
1857	DVL3	dishevelled, dsh homolog 3 (Drosophila)
1952	CELSR2	cadherin, EGF LAG seven-pass G-type receptor 2 (flamingo homolog, Drosophila)
2033	EP300	E1A binding protein p300
2254	FGF9	fibroblast growth factor 9 (glia-activating factor)
2487	FRZB	frizzled-related protein
2535	FZD2	frizzled homolog 2 (Drosophila)
2932	GSK3B	glycogen synthase kinase 3 beta
3087	HHEX	hematopoietically expressed homeobox
3611	ILK	integrin-linked kinase
3725	JUN	jun oncogene
4040	LRP6	low density lipoprotein receptor-related protein 6
4041	LRP5	low density lipoprotein receptor-related protein 5
4087	SMAD2	SMAD family member 2
4088	SMAD3	SMAD family member 3
4089	SMAD4	SMAD family member 4
4188	MDFI	MyoD family inhibitor
4316	MMP7	matrix metallopeptidase 7 (matrilysin, uterine)
4435	CITED1	Cbp/p300-interacting transactivator, with Glu/Asp-rich carboxy-terminal domain, 1
4609	MYC	v-myc myelocytomatosis viral oncogene homolog (avian)
4693	NDP	Norrie disease (pseudoglioma)
4772	NFATC1	nuclear factor of activated T-cells, cytoplasmic, calcineurin-dependent 1
4773	NFATC2	nuclear factor of activated T-cells, cytoplasmic, calcineurin-dependent 2
4775	NFATC3	nuclear factor of activated T-cells, cytoplasmic, calcineurin-dependent 3
4776	NFATC4	nuclear factor of activated T-cells, cytoplasmic, calcineurin-dependent 4
5332	PLCB4	phospholipase C, beta 4
5467	PPARD	peroxisome proliferator-activated receptor delta
5494	PPM1A	protein phosphatase 1A (formerly 2C), magnesium-dependent, alpha isoform
5515	PPP2CA	protein phosphatase 2 (formerly 2A), catalytic subunit, alpha isoform
5516	PPP2CB	protein phosphatase 2 (formerly 2A), catalytic subunit, beta isoform
5518	PPP2R1A	protein phosphatase 2 (formerly 2A), regulatory subunit A, alpha isoform
5519	PPP2R1B	protein phosphatase 2 (formerly 2A), regulatory subunit A, beta isoform
5525	PPP2R5A	protein phosphatase 2, regulatory subunit B', alpha isoform
5526	PPP2R5B	protein phosphatase 2, regulatory subunit B', beta isoform
5527	PPP2R5C	protein phosphatase 2, regulatory subunit B', gamma isoform
5528	PPP2R5D	protein phosphatase 2, regulatory subunit B', delta isoform
5529	PPP2R5E	protein phosphatase 2, regulatory subunit B', epsilon isoform
5530	PPP3CA	protein phosphatase 3 (formerly 2B), catalytic subunit, alpha isoform
5532	PPP3CB	protein phosphatase 3 (formerly 2B), catalytic subunit, beta isoform
5533	PPP3CC	protein phosphatase 3 (formerly 2B), catalytic subunit, gamma isoform
5566	PRKACA	protein kinase, cAMP-dependent, catalytic, alpha
5567	PRKACB	protein kinase, cAMP-dependent, catalytic, beta
5578	PRKCA	protein kinase C, alpha
5579	PRKCB	protein kinase C, beta
5599	MAPK8	mitogen-activated protein kinase 8
5601	MAPK9	mitogen-activated protein kinase 9
5602	MAPK10	mitogen-activated protein kinase 10
5613	PRKX	protein kinase, X-linked
5616	PRKY	protein kinase, Y-linked
5663	PSEN1	presenilin 1
5879	RAC1	ras-related C3 botulinum toxin substrate 1 (rho family, small GTP binding protein Rac1)
5880	RAC2	ras-related C3 botulinum toxin substrate 2 (rho family, small GTP binding protein Rac2)
5881	RAC3	ras-related C3 botulinum toxin substrate 3 (rho family, small GTP binding protein Rac3)
5916	RARG	retinoic acid receptor, gamma
6093	ROCK1	Rho-associated, coiled-coil containing protein kinase 1
6259	RYK	RYK receptor-like tyrosine kinase
6422	SFRP1	secreted frizzled-related protein 1
6423	SFRP2	secreted frizzled-related protein 2
6424	SFRP4	secreted frizzled-related protein 4
6468	FBXW4	F-box and WD repeat domain containing 4
6477	SIAH1	seven in absentia homolog 1 (Drosophila)
6496	SIX3	SIX homeobox 3
6500	SKP1	S-phase kinase-associated protein 1
6657	SOX2	SRY (sex determining region Y)-box 2
6659	SOX4	SRY (sex determining region Y)-box 4
6885	MAP3K7	mitogen-activated protein kinase kinase kinase 7
6907	TBL1X	transducin (beta)-like 1X-linked
6932	TCF7	transcription factor 7 (T-cell specific, HMG-box)
6934	TCF7L2	transcription factor 7-like 2 (T-cell specific, HMG-box)
7041	TGFB1I1	transforming growth factor beta 1 induced transcript 1
7088	TLE1	transducin-like enhancer of split 1 (E(sp1) homolog, Drosophila)
7089	TLE2	transducin-like enhancer of split 2 (E(sp1) homolog, Drosophila)
7090	TLE3	transducin-like enhancer of split 3 (E(sp1) homolog, Drosophila)
7091	TLE4	transducin-like enhancer of split 4 (E(sp1) homolog, Drosophila)
7157	TP53	tumor protein p53
7472	WNT2	wingless-type MMTV integration site family member 2
7473	WNT3	wingless-type MMTV integration site family, member 3
7474	WNT5A	wingless-type MMTV integration site family, member 5A
7477	WNT7B	wingless-type MMTV integration site family, member 7B
7481	WNT11	wingless-type MMTV integration site family, member 11
7482	WNT2B	wingless-type MMTV integration site family, member 2B
7855	FZD5	frizzled homolog 5 (Drosophila)
7976	FZD3	frizzled homolog 3 (Drosophila)
8061	FOSL1	FOS-like antigen 1
8313	AXIN2	axin 2
8321	FZD1	frizzled homolog 1 (Drosophila)
8322	FZD4	frizzled homolog 4 (Drosophila)
8323	FZD6	frizzled homolog 6 (Drosophila)
8324	FZD7	frizzled homolog 7 (Drosophila)
8325	FZD8	frizzled homolog 8 (Drosophila)
8454	CUL1	cullin 1
8532	CPZ	carboxypeptidase Z
8607	RUVBL1	RuvB-like 1 (E. coli)
8613	PPAP2B	phosphatidic acid phosphatase type 2B
8840	WISP1	WNT1 inducible signaling pathway protein 1
8861	LDB1	LIM domain binding 1
8932	MBD2	methyl-CpG binding domain protein 2
9209	LRRFIP2	leucine rich repeat (in FLII) interacting protein 2
9368	SLC9A3R1	solute carrier family 9 (sodium/hydrogen exchanger), member 3 regulator 1
9475	ROCK2	Rho-associated, coiled-coil containing protein kinase 2
9978	RBX1	ring-box 1
10009	ZBTB33	zinc finger and BTB domain containing 33
10042	HMGXB4	HMG box domain containing 4
10076	PTPRU	protein tyrosine phosphatase, receptor type, U
10725	NFAT5	nuclear factor of activated T-cells 5, tonicity-responsive
11197	WIF1	WNT inhibitory factor 1
11211	FZD10	frizzled homolog 10 (Drosophila)
11261	CHP	calcium binding protein P22
22943	DKK1	dickkopf homolog 1 (Xenopus laevis)
23002	DAAM1	dishevelled associated activator of morphogenesis 1
23236	PLCB1	phospholipase C, beta 1 (phosphoinositide-specific)
23291	FBXW11	F-box and WD repeat domain containing 11
23401	FRAT2	frequently rearranged in advanced T-cell lymphomas 2
23500	DAAM2	dishevelled associated activator of morphogenesis 2
25776	CBY1	chibby homolog 1 (Drosophila)
25928	SOSTDC1	sclerostin domain containing 1
26959	HBP1	HMG-box transcription factor 1
27101	CACYBP	calcyclin binding protein
27122	DKK3	dickkopf homolog 3 (Xenopus laevis)
27123	DKK2	dickkopf homolog 2 (Xenopus laevis)
27130	INVS	inversin
29117	BRD7	bromodomain containing 7
29969	MDFIC	MyoD family inhibitor domain containing
30851	TAX1BP3	Tax1 (human T-cell leukemia virus type I) binding protein 3
51176	LEF1	lymphoid enhancer-binding factor 1
51339	DACT1	dapper, antagonist of beta-catenin, homolog 1 (Xenopus laevis)
51444	RNF138	ring finger protein 138
51701	NLK	nemo-like kinase
53944	CSNK1G1	casein kinase 1, gamma 1
54764	ZRANB1	zinc finger, RAN-binding domain containing 1
56033	BARX1	BARX homeobox 1
56998	CTNNBIP1	catenin, beta interacting protein 1
57216	VANGL2	vang-like 2 (van gogh, Drosophila)
57658	CALCOCO1	calcium binding and coiled-coil domain 1
57680	CHD8	chromodomain helicase DNA binding protein 8
59343	SENP2	SUMO1/sentrin/SMT3 specific peptidase 2
59349	KLHL12	kelch-like 12 (Drosophila)
64321	SOX17	SRY (sex determining region Y)-box 17
64359	NXN	nucleoredoxin
64840	PORCN	porcupine homolog (Drosophila)
79718	TBL1XR1	transducin (beta)-like 1 X-linked receptor 1
81029	WNT5B	wingless-type MMTV integration site family, member 5B
81839	VANGL1	vang-like 1 (van gogh, Drosophila)
83439	TCF7L1	transcription factor 7-like 1 (T-cell specific, HMG-box)
83999	KREMEN1	kringle containing transmembrane protein 1
84445	LZTS2	leucine zipper, putative tumor suppressor 2
84870	RSPO3	R-spondin 3 homolog (Xenopus laevis)
85458	DIXDC1	DIX domain containing 1
90780	PYGO2	pygopus homolog 2 (Drosophila)
144165	PRICKLE1	prickle homolog 1 (Drosophila)
440193	CCDC88C	coiled-coil domain containing 88C
